# Supplementary material
Source: Springer Nature journal article supplement (https://www.springermedizin.de/resource/supplementary/12913_2012_2382_MOESM2_ESM.pdf/9530818)

# Use of medicines in Chilean public hospitals

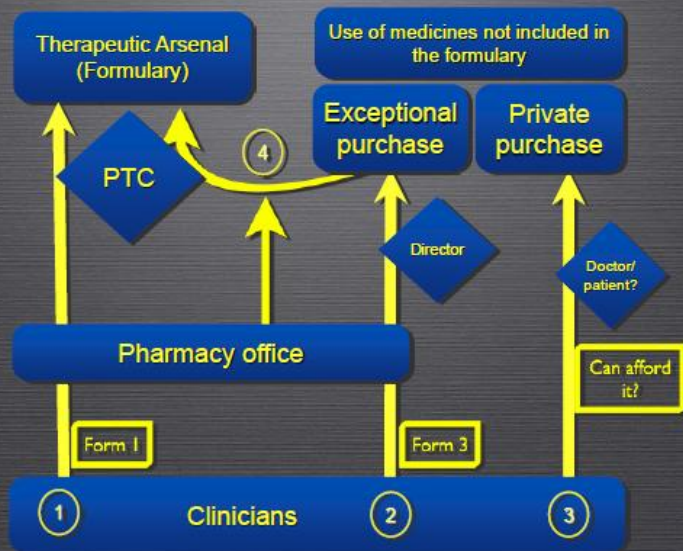

Supplement: MOESM2 [file 9530818]
